# Supplementary material
Source: PubMed Central journal article supplement (PMC5096367)
Supplement: NIHMS411285-supplement-Supp_FigureS7.pdf [file NIHMS411285-supplement-Supp_FigureS7.pdf]

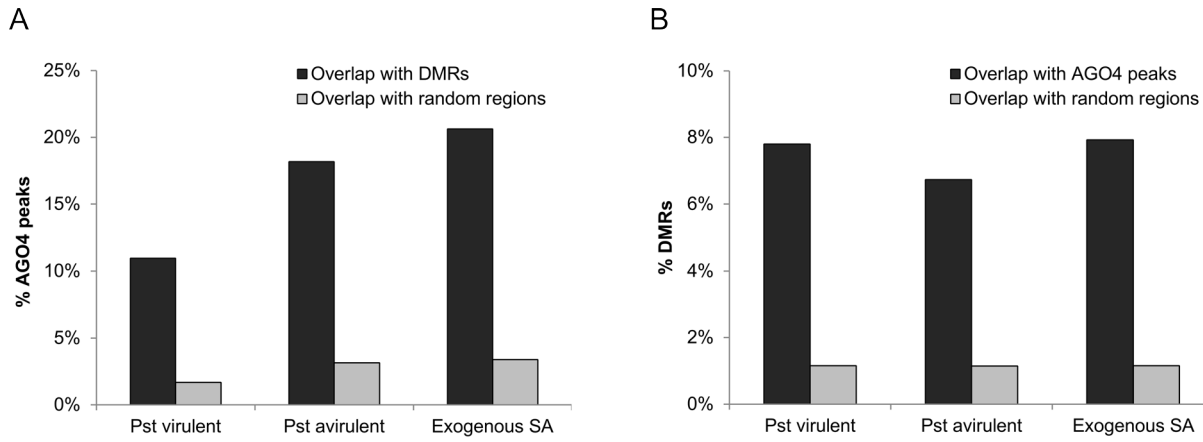

**Figure S7.** AGO4 binding overlaps genomic regions containing stress-induced differential CHH methylation.

A. Percentages of AGO4 peaks overlapping differentially methylated regions (DMRs) identified upon treatment with biotic stress (Dowen *et al.*, 2012). Average overlaps of AGO4 peaks with 1000 random genomic regions are shown as controls (light grey bars). All enrichments are statistically significant ( $p < 0.001$ ).

B. Percentages of differentially methylated regions (DMRs) identified upon treatment with biotic stress (Dowen *et al.*, 2012) overlapping AGO4 peaks. Average overlaps of DMRs with 1000 random genomic regions are shown as controls (light grey bars). All enrichments are statistically significant ( $p < 0.001$ ).
